# Supplementary material for: Pathophysiological pathways in patients with heart failure and atrial fibrillation
Source: PubMed Central journal article supplement — Cardiovasc Res. 2021 Oct 23;118(11):2478–87. doi: 10.1093/cvr/cvab331 (PMC9400416; doi:10.1093/cvr/cvab331), 2021-10-23
Supplement: cvab331_supplementary_data.pdf [file cvab331_supplementary_data.pdf]

## **Supplemental Material**

This appendix has been provided by the authors to give readers additional information about their work.

Supplement to: Santema, BT, Artola Arita V, Sama IE et al. Pathophysiological Pathways in Patients with Heart Failure and Atrial Fibrillation.

TABLE OF CONTENTS

|                                                                                          |           |
|------------------------------------------------------------------------------------------|-----------|
| <b>Supplementary Figure 1:</b> Flow chart of selected patients.....                      | <b>3</b>  |
| <b>Supplementary Figure 2:</b> STROBE Statement.....                                     | <b>4</b>  |
| <b>Supplementary Figure 3:</b> Volcano plots adjusted for age and sex.....               | <b>6</b>  |
| <b>Supplementary Table 1:</b> Overview of differential expression of 92 biomarkers.....  | <b>7</b>  |
| in patients with atrial fibrillation compared with sinus rhythm in the index cohort      |           |
| <b>Supplementary Table 2:</b> Overview of differential expression of 92 biomarkers ..... | <b>12</b> |
| in patients with atrial fibrillation compared with sinus rhythm in the validation cohort |           |

**Supplementary Figure 1.** Flow chart of selected patients.

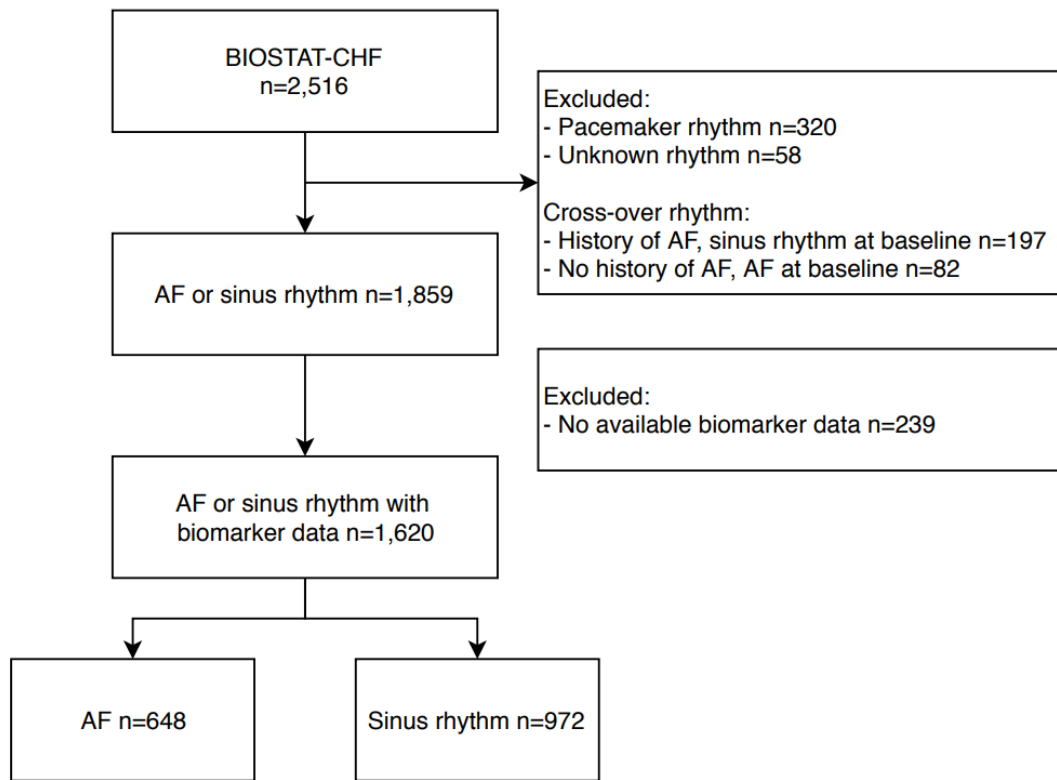

## Supplementary Figure 2. STROBE Statement

|                           | Item No | Recommendation                                                                                                                                                                                                                                                                                                         | Page No                   |
|---------------------------|---------|------------------------------------------------------------------------------------------------------------------------------------------------------------------------------------------------------------------------------------------------------------------------------------------------------------------------|---------------------------|
| <b>Title and abstract</b> | 1       | (a) Indicate the study's design with a commonly used term in the title or the abstract<br>(b) Provide in the abstract an informative and balanced summary of what was done and what was found                                                                                                                          | 2                         |
| <b>Introduction</b>       |         |                                                                                                                                                                                                                                                                                                                        |                           |
| Background/rationale      | 2       | Explain the scientific background and rationale for the investigation being reported                                                                                                                                                                                                                                   | 4                         |
| Objectives                | 3       | State specific objectives, including any prespecified hypotheses                                                                                                                                                                                                                                                       | 4                         |
| <b>Methods</b>            |         |                                                                                                                                                                                                                                                                                                                        |                           |
| Study design              | 4       | Present key elements of study design early in the paper                                                                                                                                                                                                                                                                | 5                         |
| Setting                   | 5       | Describe the setting, locations, and relevant dates, including periods of recruitment, exposure, follow-up, and data collection                                                                                                                                                                                        | 5                         |
| Participants              | 6       | (a) Give the eligibility criteria, and the sources and methods of selection of participants. Describe methods of follow-up<br><br>(b) For matched studies, give matching criteria and number of exposed and unexposed                                                                                                  | 5, 6, suppl material      |
| Variables                 | 7       | Clearly define all outcomes, exposures, predictors, potential confounders, and effect modifiers. Give diagnostic criteria, if applicable                                                                                                                                                                               | 5, 6, 7                   |
| Data sources/measurement  | 8*      | For each variable of interest, give sources of data and details of methods of assessment (measurement). Describe comparability of assessment methods if there is more than one group                                                                                                                                   | 5, 6, 7                   |
| Bias                      | 9       | Describe any efforts to address potential sources of bias                                                                                                                                                                                                                                                              | 5, 6, 7                   |
| Study size                | 10      | Explain how the study size was arrived at                                                                                                                                                                                                                                                                              | 5, 6                      |
| Quantitative variables    | 11      | Explain how quantitative variables were handled in the analyses. If applicable, describe which groupings were chosen and why                                                                                                                                                                                           | 6, 7                      |
| Statistical methods       | 12      | (a) Describe all statistical methods, including those used to control for confounding<br>(b) Describe any methods used to examine subgroups and interactions<br>(c) Explain how missing data were addressed<br>(d) If applicable, explain how loss to follow-up was addressed<br>(e) Describe any sensitivity analyses | 6, 7<br>7<br>6<br>NA<br>7 |
| <b>Results</b>            |         |                                                                                                                                                                                                                                                                                                                        |                           |
| Participants              | 13*     | (a) Report numbers of individuals at each stage of study—eg numbers potentially eligible, examined for eligibility, confirmed eligible, included in the study, completing follow-up, and analysed<br>(b) Give reasons for non-participation at each stage<br>(c) Consider use of a flow diagram                        | 7, suppl material         |
| Descriptive data          | 14*     | (a) Give characteristics of study participants (eg demographic, clinical, social) and information on exposures and potential confounders                                                                                                                                                                               | 7, 8, 9, table 1 and      |

|                          |     |                                                                                                                                                                                                              |                                      |
|--------------------------|-----|--------------------------------------------------------------------------------------------------------------------------------------------------------------------------------------------------------------|--------------------------------------|
|                          |     | (b) Indicate number of participants with missing data for each variable of interest                                                                                                                          | 2<br>6                               |
|                          |     | (c) Summarise follow-up time (eg, average and total amount)                                                                                                                                                  | NA                                   |
| Outcome data             | 15* | Report numbers of outcome events or summary measures over time                                                                                                                                               | NA                                   |
| <hr/>                    |     |                                                                                                                                                                                                              |                                      |
| Main results             | 16  | (a) Give unadjusted estimates and, if applicable, confounder-adjusted estimates and their precision (eg, 95% confidence interval). Make clear which confounders were adjusted for and why they were included | 7, 8, 9, ,                           |
|                          |     | (b) Report category boundaries when continuous variables were categorized                                                                                                                                    | table 1, 2<br>suppl<br>mate-<br>rial |
|                          |     | (c) If relevant, consider translating estimates of relative risk into absolute risk for a meaningful time period                                                                                             | NA                                   |
| Other analyses           | 17  | Report other analyses done—eg analyses of subgroups and interactions, and sensitivity analyses                                                                                                               | 10                                   |
| <hr/>                    |     |                                                                                                                                                                                                              |                                      |
| <b>Discussion</b>        |     |                                                                                                                                                                                                              |                                      |
| Key results              | 18  | Summarise key results with reference to study objectives                                                                                                                                                     | 10                                   |
| Limitations              | 19  | Discuss limitations of the study, taking into account sources of potential bias or imprecision. Discuss both direction and magnitude of any potential bias                                                   | 13, 14                               |
| Interpretation           | 20  | Give a cautious overall interpretation of results considering objectives, limitations, multiplicity of analyses, results from similar studies, and other relevant evidence                                   | 10, 11,<br>12, 13                    |
| Generalisability         | 21  | Discuss the generalisability (external validity) of the study results                                                                                                                                        | 10,11,12,<br>13                      |
| <hr/>                    |     |                                                                                                                                                                                                              |                                      |
| <b>Other information</b> |     |                                                                                                                                                                                                              |                                      |
| Funding                  | 22  | Give the source of funding and the role of the funders for the present study and, if applicable, for the original study on which the present article is based                                                | 15                                   |

Supplementary Figure 3. Volcano plots adjusted for age and sex.

**A. Index cohort**

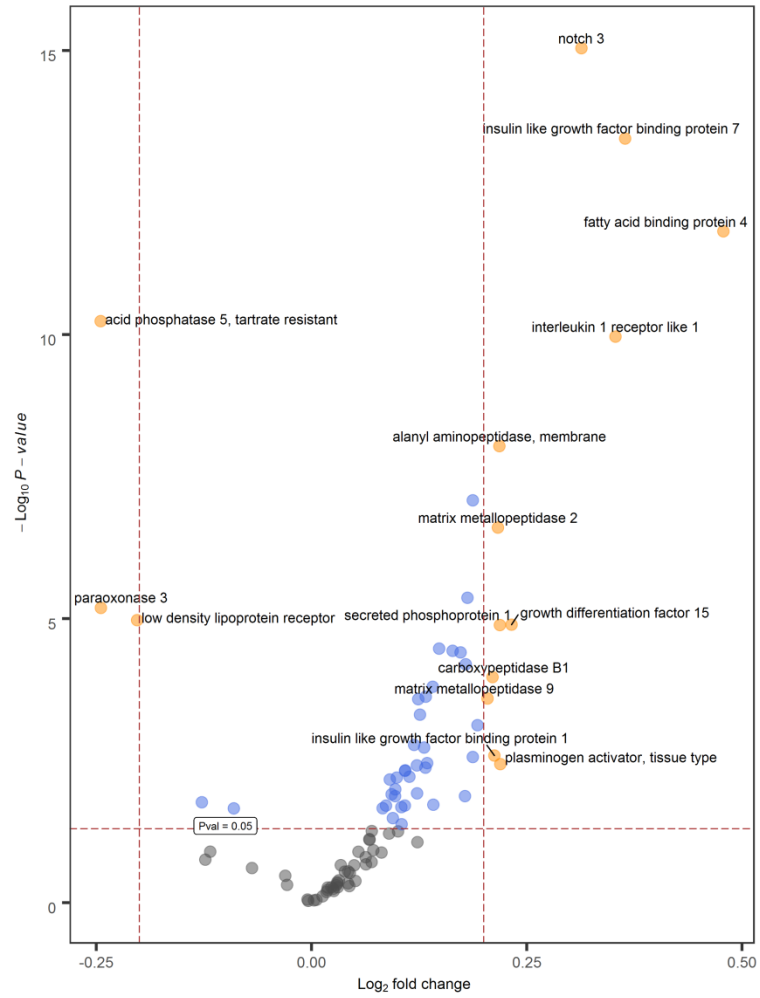

**B. Validation cohort**

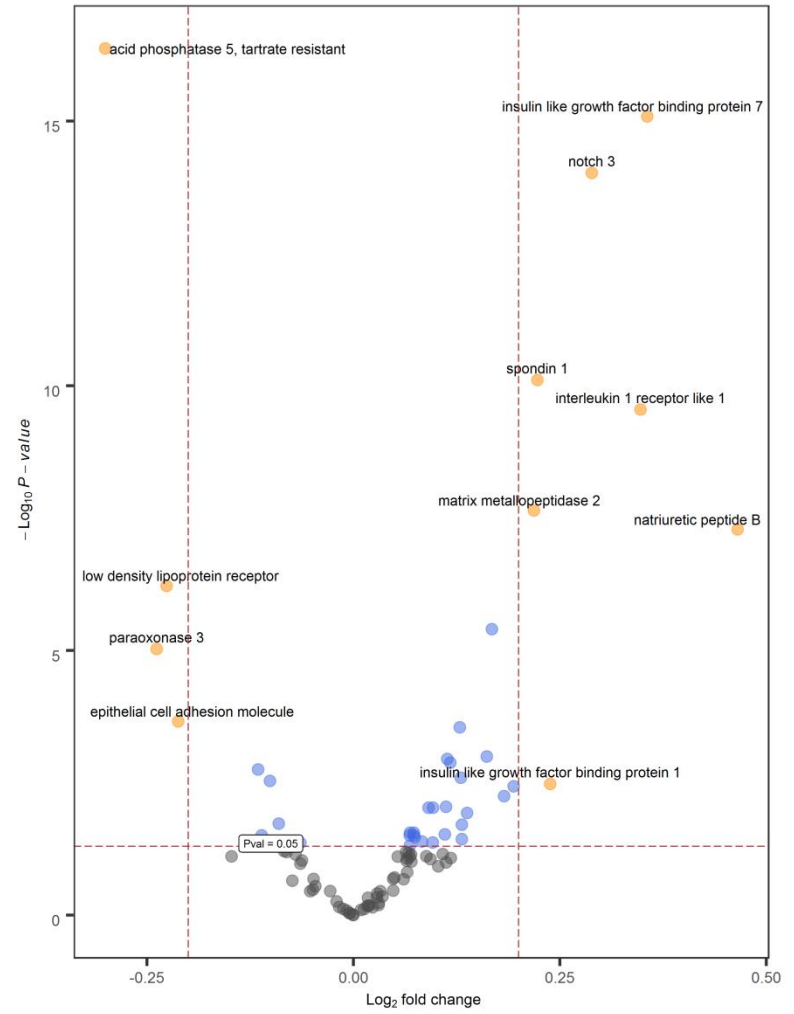

**Supplementary Table 1.** Overview of differential expression of 92 biomarkers in patients with atrial fibrillation compared with sinus rhythm in the index cohort.

| Protein | logFC  | AveExpr | t     | P.Value  | adj.P.Val | B     | GeneID | Symbol    | Description                                  | Olink              | Short    | DE_hits       |
|---------|--------|---------|-------|----------|-----------|-------|--------|-----------|----------------------------------------------|--------------------|----------|---------------|
| Q9UM47  | 0,383  | 3,18    | 10,25 | 6,40E-24 | 5,89E-22  | 43,36 | 4854   | NOTCH3    | notch 3                                      | NPX_124_NOTCH_3    | NOTCH3   | upregulated   |
| Q16270  | 0,406  | 3,69    | 8,91  | 1,35E-18 | 6,19E-17  | 31,28 | 3490   | IGFBP7    | insulin like growth factor binding protein 7 | NPX_180_IGFBP_7    | IGFBP-7  | upregulated   |
| Q01638  | 0,435  | 3,78    | 8,33  | 1,75E-16 | 5,35E-15  | 26,50 | 9173   | IL1RL1    | interleukin 1 receptor like 1                | NPX_176_ST2        | ST2      | upregulated   |
| P15090  | 0,525  | 5,28    | 7,86  | 7,17E-15 | 1,65E-13  | 22,85 | 2167   | FABP4     | fatty acid binding protein 4                 | NPX_129_FABP4      | FABP4    | upregulated   |
| Q99988  | 0,405  | 4,91    | 7,72  | 1,97E-14 | 3,63E-13  | 21,86 | 9518   | GDF15     | growth differentiation factor 15             | NPX_135_GDF_15     | GDF-15   | upregulated   |
| P98160  | 0,277  | 6,40    | 7,22  | 7,67E-13 | 1,18E-11  | 18,28 | 3339   | HSPG2     | heparan sulfate proteoglycan 2               | NPX_122_PLC        | PLC      | upregulated   |
| Q9HCB6  | 0,240  | 1,71    | 7,15  | 1,33E-12 | 1,62E-11  | 17,74 | 10418  | SPON1     | spondin 1                                    | NPX_139_SPON1      | SPON1    | upregulated   |
| Q99727  | 0,299  | 4,45    | 7,14  | 1,40E-12 | 1,62E-11  | 17,69 | 7079   | TIMP4     | TIMP metalloproteinase inhibitor 4           | NPX_125_TIMP4      | TIMP4    | upregulated   |
| P08253  | 0,266  | 2,77    | 6,65  | 4,07E-11 | 4,16E-10  | 14,40 | 4313   | MMP2      | matrix metalloproteinase 2                   | NPX_156_MMP_2      | MMP-2    | upregulated   |
| P10451  | 0,314  | 4,80    | 6,48  | 1,18E-10 | 1,08E-09  | 13,36 | 6696   | SPP1      | secreted phosphoprotein 1                    | NPX_163_OPN        | OPN      | upregulated   |
| Q03405  | 0,247  | 4,07    | 6,42  | 1,80E-10 | 1,51E-09  | 12,95 | 5329   | PLAUR     | plasminogen activator, urokinase receptor    | NPX_162_U_PAR      | U-PAR    | upregulated   |
| P18065  | 0,300  | 7,61    | 6,40  | 2,00E-10 | 1,54E-09  | 12,85 | 3485   | IGFBP2    | insulin like growth factor binding protein 2 | NPX_192_IGFBP_2    | IGFBP-2  | upregulated   |
| P36222  | 0,381  | 5,62    | 6,27  | 4,58E-10 | 3,24E-09  | 12,04 | 1116   | CHI3L1    | chitinase 3 like 1                           | NPX_175_CHI3L1     | CHI3L1   | upregulated   |
| P08833  | 0,398  | 4,60    | 5,75  | 1,08E-08 | 6,64E-08  | 8,97  | 3484   | IGFBP1    | insulin like growth factor binding protein 1 | NPX_144_IGFBP_1    | IGFBP-1  | upregulated   |
| Q07654  | 0,269  | 5,22    | 5,55  | 3,27E-08 | 1,77E-07  | 7,90  | 7033   | TFF3      | trefoil factor 3                             | NPX_112_TFF3       | TFF3     | upregulated   |
| P02144  | 0,276  | 6,22    | 5,31  | 1,23E-07 | 5,93E-07  | 6,63  | 4151   | MB        | myoglobin                                    | NPX_158_MB         | MB       | upregulated   |
| P16860  | 0,353  | 3,02    | 5,04  | 5,22E-07 | 2,28E-06  | 5,23  | 4879   | NPPB      | natriuretic peptide B                        | NPX_195_NT_PRO_BNP | NTproBNP | upregulated   |
| P04080  | 0,225  | 4,64    | 5,02  | 5,73E-07 | 2,29E-06  | 5,14  | 1476   | CSTB      | cystatin B                                   | NPX_114_CSTB       | CSTB     | upregulated   |
| P20333  | 0,212  | 4,35    | 4,66  | 3,45E-06 | 1,27E-05  | 3,42  | 7133   | TNFRSF1B  | TNF receptor superfamily member 1B           | NPX_106_TNF_R2     | TNF-R2   | upregulated   |
| P19438  | 0,213  | 4,96    | 4,53  | 6,28E-06 | 2,06E-05  | 2,85  | 7132   | TNFRSF1A  | TNF receptor superfamily member 1A           | NPX_191_TNF_R1     | TNF-R1   | upregulated   |
| P15086  | 0,225  | 3,37    | 4,34  | 1,52E-05 | 4,65E-05  | 2,01  | 1360   | CPB1      | carboxypeptidase B1                          | NPX_174_CPB1       | CPB1     | upregulated   |
| P08254  | 0,217  | 6,70    | 4,22  | 2,56E-05 | 7,37E-05  | 1,51  | 4314   | MMP3      | matrix metalloproteinase 3                   | NPX_186_MMP_3      | MMP-3    | upregulated   |
| P00750  | 0,294  | 5,03    | 4,08  | 4,76E-05 | 1,29E-04  | 0,93  | 5327   | PLAT      | plasminogen activator, tissue type           | NPX_177_T_PA       | t-PA     | upregulated   |
| P15085  | 0,206  | 3,69    | 3,78  | 1,64E-04 | 3,78E-04  | -0,24 | 1357   | CPA1      | carboxypeptidase A1                          | NPX_166_CPA1       | CPA1     | upregulated   |
| P13686  | -0,199 | 4,31    | -5,60 | 2,51E-08 | 1,44E-07  | 8,16  | 54     | ACP5      | acid phosphatase 5, tartrate resistant       | NPX_148_TR_AP      | TR-AP    | no difference |
| O00300  | 0,195  | 2,64    | 5,37  | 8,88E-08 | 4,54E-07  | 6,94  | 4982   | TNFRSF11B | TNF receptor superfamily member 11b          | NPX_110_OPG        | OPG      | no difference |
| P36941  | 0,194  | 2,99    | 5,07  | 4,48E-07 | 2,06E-06  | 5,38  | 4055   | LTBR      | lymphotoxin beta receptor                    | NPX_123_LTBR       | LTBR     | no difference |



|        |       |      |      |          |          |       |        |          |                                            |                  |          |               |
|--------|-------|------|------|----------|----------|-------|--------|----------|--------------------------------------------|------------------|----------|---------------|
| P15144 | 0,182 | 4,24 | 5,03 | 5,45E-07 | 2,28E-06 | 5,19  | 290    | ANPEP    | alanyl aminopeptidase, membrane            | NPX_153_AP_N     | AP-N     | no difference |
| P14778 | 0,179 | 5,84 | 4,93 | 9,13E-07 | 3,50E-06 | 4,69  | 3554   | IL1R1    | interleukin 1 receptor type 1              | NPX_155_IL_1RT1  | IL-1RT1  | no difference |
| P02786 | 0,198 | 5,02 | 4,62 | 4,18E-06 | 1,48E-05 | 3,24  | 7037   | TFRC     | transferrin receptor                       | NPX_133_TR       | TR       | no difference |
| P07339 | 0,155 | 3,22 | 4,36 | 1,36E-05 | 4,32E-05 | 2,11  | 1509   | CTSD     | cathepsin D                                | NPX_164_CTSD     | CTSD     | no difference |
| P78324 | 0,152 | 2,92 | 4,25 | 2,24E-05 | 6,64E-05 | 1,64  | 140885 | SIRPA    | signal regulatory protein alpha            | NPX_170_SHPS_1   | SHPS-1   | no difference |
| P28799 | 0,132 | 2,99 | 4,09 | 4,57E-05 | 1,27E-04 | 0,96  | 2896   | GRN      | granulin precursor                         | NPX_118_GRN      | GRN      | no difference |
| O95998 | 0,158 | 5,67 | 4,00 | 6,55E-05 | 1,72E-04 | 0,62  | 10068  | IL18BP   | interleukin 18 binding protein             | NPX_182_IL_18BP  | IL-18BP  | no difference |
| Q86VB7 | 0,161 | 6,77 | 3,98 | 7,34E-05 | 1,88E-04 | 0,52  | 9332   | CD163    | CD163 molecule                             | NPX_116_CD163    | CD163    | no difference |
| O75594 | 0,170 | 6,55 | 3,93 | 9,01E-05 | 2,24E-04 | 0,32  | 8993   | PGLYRP1  | peptidoglycan recognition protein 1        | NPX_165_PGLYRP1  | PGLYRP1  | no difference |
| P00749 | 0,134 | 3,86 | 3,91 | 9,70E-05 | 2,35E-04 | 0,25  | 5328   | PLAU     | plasminogen activator, urokinase           | NPX_173_UPA      | uPA      | no difference |
| P30530 | 0,140 | 7,07 | 3,82 | 1,37E-04 | 3,24E-04 | -0,07 | 558    | AXL      | AXL receptor tyrosine kinase               | NPX_154_AXL      | AXL      | no difference |
| O15467 | 0,164 | 5,34 | 3,73 | 2,00E-04 | 4,50E-04 | -0,43 | 6360   | CCL16    | C-C motif chemokine ligand 16              | NPX_196_CCL16    | CCL16    | no difference |
| Q9HD89 | 0,160 | 5,95 | 3,70 | 2,27E-04 | 4,96E-04 | -0,54 | 56729  | RETN     | resistin                                   | NPX_143_RETN     | RETN     | no difference |
| P02452 | 0,127 | 1,61 | 3,69 | 2,32E-04 | 4,97E-04 | -0,56 | 1277   | COL1A1   | collagen type I alpha 1 chain              | NPX_183_COL1A1   | COL1A1   | no difference |
| Q96PL1 | 0,194 | 2,18 | 3,68 | 2,43E-04 | 5,07E-04 | -0,60 | 117156 | SCGB3A2  | secretoglobin family 3A member 2           | NPX_178_SCGB3A2  | SCGB3A2  | no difference |
| P13598 | 0,134 | 4,26 | 3,64 | 2,78E-04 | 5,69E-04 | -0,73 | 3384   | ICAM2    | intercellular adhesion molecule 2          | NPX_188_ICAM_2   | ICAM-2   | no difference |
| Q13740 | 0,114 | 4,11 | 3,54 | 4,06E-04 | 8,13E-04 | -1,09 | 214    | ALCAM    | activated leukocyte cell adhesion molecule | NPX_111_ALCAM    | ALCAM    | no difference |
| P80370 | 0,170 | 4,18 | 3,49 | 4,88E-04 | 9,55E-04 | -1,26 | 8788   | DLK1     | delta like non-canonical Notch ligand 1    | NPX_138_DLK_1    | DLK-1    | no difference |
| P13500 | 0,123 | 2,26 | 3,45 | 5,76E-04 | 1,10E-03 | -1,41 | 6347   | CCL2     | C-C motif chemokine ligand 2               | NPX_115_MCP_1    | MCP-1    | no difference |
| P27930 | 0,116 | 4,02 | 3,40 | 6,91E-04 | 1,30E-03 | -1,58 | 7850   | IL1R2    | interleukin 1 receptor type 2              | NPX_169_IL_1RT2  | IL-1RT2  | no difference |
| Q16663 | 0,136 | 6,57 | 3,26 | 1,13E-03 | 2,08E-03 | -2,03 | 6359   | CCL15    | C-C motif chemokine ligand 15              | NPX_171_CCL15    | CCL15    | no difference |
| Q92956 | 0,141 | 4,20 | 3,24 | 1,21E-03 | 2,19E-03 | -2,10 | 8764   | TNFRSF14 | TNF receptor superfamily member 14         | NPX_101_TNFRSF14 | TNFRSF14 | no difference |
| P33151 | 0,114 | 2,73 | 3,15 | 1,64E-03 | 2,87E-03 | -2,38 | 1003   | CDH5     | cadherin 5                                 | NPX_127_CDH5     | CDH5     | no difference |
| P54760 | 0,095 | 1,54 | 3,15 | 1,66E-03 | 2,87E-03 | -2,38 | 2050   | EPHB4    | EPH receptor B4                            | NPX_108_EPHB4    | EPHB4    | no difference |
| Q9Y275 | 0,125 | 5,37 | 3,11 | 1,88E-03 | 3,20E-03 | -2,50 | 10673  | TNFSF13B | TNF superfamily member 13b                 | NPX_159_TNFSF13B | TNFSF13B | no difference |
| P56470 | 0,123 | 3,00 | 2,98 | 2,92E-03 | 4,89E-03 | -2,90 | 3960   | LGALS4   | galectin 4                                 | NPX_168_GAL_4    | Gal-4    | no difference |

|        |        |       |       |          |          |       |       |           |                                                   |                        |           |               |
|--------|--------|-------|-------|----------|----------|-------|-------|-----------|---------------------------------------------------|------------------------|-----------|---------------|
| P19957 | 0,126  | 3,26  | 2,92  | 3,51E-03 | 5,77E-03 | -3,07 | 5266  | PI3       | peptidase inhibitor 3                             | NPX_151_PI3            | PI3       | no difference |
| P24158 | 0,122  | 4,00  | 2,90  | 3,83E-03 | 6,18E-03 | -3,15 | 5657  | PRTN3     | proteinase 3                                      | NPX_160_PRTN3          | PRTN3     | no difference |
| Q12860 | 0,099  | 1,85  | 2,88  | 4,02E-03 | 6,38E-03 | -3,19 | 1272  | CNTN1     | contactin 1                                       | NPX_126_CNTN1          | CNTN1     | no difference |
| Q9NPY3 | 0,097  | 8,86  | 2,78  | 5,54E-03 | 8,65E-03 | -3,48 | 22918 | CD93      | CD93 molecule                                     | NPX_181_CD93           | CD93      | no difference |
| Q9UBR2 | 0,097  | 4,15  | 2,69  | 7,15E-03 | 1,10E-02 | -3,71 | 1522  | CTSZ      | cathepsin Z                                       | NPX_185_CTSZ           | CTSZ      | no difference |
| P25445 | 0,098  | 4,15  | 2,66  | 7,87E-03 | 1,17E-02 | -3,80 | 355   | FAS       | Fas cell surface death receptor                   | NPX_157_FAS            | FAS       | no difference |
| Q9H2A7 | 0,090  | 5,51  | 2,63  | 8,59E-03 | 1,25E-02 | -3,87 | 58191 | CXCL16    | C-X-C motif chemokine ligand 16                   | NPX_141_CXCL16         | CXCL16    | no difference |
| O14798 | 0,096  | 5,24  | 2,45  | 1,45E-02 | 2,08E-02 | -4,34 | 8794  | TNFRSF10C | TNF receptor superfamily member 10c               | NPX_134_TNFRSF10C      | TNFRSF10C | no difference |
| P04275 | 0,167  | 6,07  | 2,44  | 1,50E-02 | 2,12E-02 | -4,37 | 7450  | VWF       | von Willebrand factor                             | NPX_193_VWF            | vWF       | no difference |
| P14780 | 0,131  | 3,10  | 2,43  | 1,54E-02 | 2,14E-02 | -4,39 | 4318  | MMP9      | matrix metalloproteinase 9                        | NPX_107_MMP_9          | MMP-9     | no difference |
| P01589 | 0,104  | 3,67  | 2,39  | 1,68E-02 | 2,31E-02 | -4,47 | 3559  | IL2RA     | interleukin 2 receptor subunit alpha              | NPX_109_IL2_RA         | IL2-RA    | no difference |
| P16422 | -0,122 | 2,90  | -2,39 | 1,71E-02 | 2,31E-02 | -4,48 | 4072  | EPCAM     | epithelial cell adhesion molecule                 | NPX_152_EP_CAM         | Ep-Cam    | no difference |
| P10646 | -0,084 | 7,70  | -2,23 | 2,56E-02 | 3,41E-02 | -4,83 | 7035  | TFPI      | tissue factor pathway inhibitor                   | NPX_130_TFPI           | TFPI      | no difference |
| Q96F46 | 0,081  | 3,24  | 2,21  | 2,76E-02 | 3,62E-02 | -4,90 | 23765 | IL17RA    | interleukin 17 receptor A                         | NPX_105_IL_17RA        | IL-17RA   | no difference |
| Q13867 | 0,076  | 4,52  | 2,20  | 2,83E-02 | 3,67E-02 | -4,92 | 642   | BLMH      | bleomycin hydrolase                               | NPX_121_BLM_HYDROLASE  | BLM HL    | no difference |
| Q9NQ76 | 0,078  | 2,20  | 2,13  | 3,34E-02 | 4,27E-02 | -5,06 | 56955 | MEPE      | matrix extracellular phosphoglycoprotein          | NPX_120_MEPE           | MEPE      | no difference |
| P05164 | 0,073  | 3,51  | 2,01  | 4,48E-02 | 5,65E-02 | -5,31 | 4353  | MPO       | myeloperoxidase                                   | NPX_140_MPO            | MPO       | no difference |
| P16581 | 0,078  | 1,50  | 1,98  | 4,75E-02 | 5,91E-02 | -5,36 | 6401  | SELE      | selectin E                                        | NPX_136_SELE           | SELE      | no difference |
| P16109 | -0,112 | 8,23  | -1,97 | 4,95E-02 | 6,07E-02 | -5,39 | 6403  | SELP      | selectin P                                        | NPX_113_SELP           | SELP      | no difference |
| P17931 | 0,068  | 4,42  | 1,85  | 6,49E-02 | 7,85E-02 | -5,62 | 3958  | LGALS3    | galectin 3                                        | NPX_117_GAL_3          | Gal-3     | no difference |
| P05107 | 0,068  | 4,40  | 1,80  | 7,23E-02 | 8,64E-02 | -5,71 | 3689  | ITGB2     | integrin subunit beta 2                           | NPX_103_ITGB2          | ITGB2     | no difference |
| P35247 | 0,072  | 2,11  | 1,76  | 7,82E-02 | 9,22E-02 | -5,77 | 6441  | SFTPD     | surfactant protein D                              | NPX_150_PSP_D          | PSP-D     | no difference |
| Q92876 | 0,041  | 2,73  | 1,64  | 1,01E-01 | 1,17E-01 | -5,97 | 5653  | KLK6      | kallikrein related peptidase 6                    | NPX_189_KLK6           | KLK6      | no difference |
| P20160 | 0,080  | 2,15  | 1,64  | 1,02E-01 | 1,17E-01 | -5,98 | 566   | AZU1      | azurocidin 1                                      | NPX_137_AZU1           | AZU1      | no difference |
| Q13231 | 0,102  | 2,17  | 1,35  | 1,79E-01 | 2,03E-01 | -6,41 | 1118  | CHIT1     | chitinase 1                                       | NPX_145_CHIT1          | CHIT1     | no difference |
| P04085 | -0,064 | 1,87  | -1,05 | 2,94E-01 | 3,30E-01 | -6,77 | 5154  | PDGFA     | platelet derived growth factor subunit A          | NPX_190_PDGF_SUBUNIT_A | PDGFsA    | no difference |
| P08887 | 0,035  | 10,08 | 1,04  | 3,01E-01 | 3,33E-01 | -6,78 | 3570  | IL6R      | interleukin 6 receptor                            | NPX_142_IL_6RA         | IL6-RA    | no difference |
| P16284 | 0,051  | 4,30  | 1,00  | 3,19E-01 | 3,49E-01 | -6,82 | 5175  | PECAM1    | platelet and endothelial cell adhesion molecule 1 | NPX_194_PECAM_1        | PECAM-1   | no difference |
| P05121 | 0,045  | 4,92  | 0,74  | 4,59E-01 | 4,96E-01 | -7,04 | 5054  | SERPINE1  | serpin family E member 1                          | NPX_131_PAI            | PAI       | no difference |
| O00626 | -0,032 | 1,58  | -0,63 | 5,27E-01 | 5,64E-01 | -7,12 | 6367  | CCL22     | C-C motif chemokine ligand 22                     | NPX_149_CCL22          | CCL22     | no difference |

|        |        |       |       |          |          |       |        |         |                                                       |                      |         |               |
|--------|--------|-------|-------|----------|----------|-------|--------|---------|-------------------------------------------------------|----------------------|---------|---------------|
| O00175 | 0,032  | 4,84  | 0,60  | 5,52E-01 | 5,84E-01 | -7,14 | 6369   | CCL24   | C-C motif chemokine ligand 24                         | NPX_132_CCL24        | CCL24   | no difference |
| Q8NBP7 | -0,017 | 1,84  | -0,56 | 5,74E-01 | 6,00E-01 | -7,16 | 255738 | PCSK9   | proprotein convertase subtilisin/kexin type 9         | NPX_161_PCSK9        | PCSK9   | no difference |
| Q99969 | -0,013 | 10,97 | -0,43 | 6,68E-01 | 6,91E-01 | -7,22 | 5919   | RARRES2 | retinoic acid receptor responder 2                    | NPX_187_RARRES2      | RARRES2 | no difference |
| Q9Y624 | 0,020  | 4,66  | 0,32  | 7,50E-01 | 7,66E-01 | -7,26 | 50848  | F11R    | F11 receptor                                          | NPX_167_JAM_A        | JAM-A   | no difference |
| P00533 | -0,004 | 0,59  | -0,15 | 8,83E-01 | 8,93E-01 | -7,30 | 1956   | EGFR    | epidermal growth factor receptor                      | NPX_179_EGFR         | EGFR    | no difference |
| Q5T2D2 | 0,002  | 3,49  | 0,04  | 9,69E-01 | 9,69E-01 | -7,31 | 79865  | TREML2  | triggering receptor expressed on myeloid cells like 2 | NPX_128_TLT_2        | TLT-2   | no difference |
| P01130 | -0,269 | 3,03  | -6,07 | 1,54E-09 | 1,01E-08 | 10,86 | 3949   | LDLR    | low density lipoprotein receptor                      | NPX_102_LDL_RECEPTOR | LDL     | downregulated |
| Q15166 | -0,236 | 4,23  | -4,57 | 5,28E-06 | 1,80E-05 | 3,01  | 5446   | PON3    | paraoxonase 3                                         | NPX_184_PON3         | PON3    | downregulated |
| P42574 | -0,234 | 6,77  | -2,67 | 7,57E-03 | 1,14E-02 | -3,76 | 836    | CASP3   | caspase 3                                             | NPX_172_CASP_3       | CASP-3  | downregulated |

**Supplementary Table 2.** Overview of differential expression of 92 biomarkers in patients with atrial fibrillation compared with sinus rhythm in the validation cohort.

| Protein | logFC  | AveExpr | t     | P.Value  | adj.P.Val | B     | GeneID | Symbol    | Description                                       | Olink              | Short    | DE_hits       |
|---------|--------|---------|-------|----------|-----------|-------|--------|-----------|---------------------------------------------------|--------------------|----------|---------------|
| Q16270  | 0,379  | 4,19    | 8,79  | 5,13E-18 | 4,43E-16  | 30,07 | 3490   | IGFBP7    | insulin like growth factor binding protein 7      | NPX_180_IGFBP_7    | IGFBP-7  | upregulated   |
| Q9UM47  | 0,320  | 3,76    | 8,66  | 1,44E-17 | 4,43E-16  | 29,05 | 4854   | NOTCH3    | notch 3                                           | NPX_124_NOTCH_3    | NOTCH3   | upregulated   |
| Q9HCB6  | 0,242  | 2,12    | 7,17  | 1,29E-12 | 2,97E-11  | 17,89 | 10418  | SPON1     | spondin 1                                         | NPX_139_SPON1      | SPON1    | upregulated   |
| Q01638  | 0,386  | 4,28    | 7,12  | 1,87E-12 | 3,44E-11  | 17,53 | 9173   | IL1RL1    | interleukin 1 receptor like 1                     | NPX_176_ST2        | ST2      | upregulated   |
| P16860  | 0,579  | 3,07    | 6,67  | 3,78E-11 | 5,79E-10  | 14,60 | 4879   | NPPB      | natriuretic peptide B                             | NPX_195_NT_PRO_BNP | NTproBNP | upregulated   |
| P08253  | 0,235  | 3,34    | 6,12  | 1,25E-09 | 1,44E-08  | 11,19 | 4313   | MMP2      | matrix metalloproteinase 2                        | NPX_156_MMP_2      | MMP-2    | upregulated   |
| P08833  | 0,333  | 4,60    | 4,00  | 6,68E-05 | 6,15E-04  | 0,75  | 3484   | IGFBP1    | insulin like growth factor binding protein 1      | NPX_144_IGFBP_1    | IGFBP-1  | upregulated   |
| Q99988  | 0,216  | 5,48    | 3,89  | 1,08E-04 | 7,62E-04  | 0,30  | 9518   | GDF15     | growth differentiation factor 15                  | NPX_135_GDF_15     | GDF-15   | upregulated   |
| P15144  | 0,142  | 4,64    | 3,93  | 8,93E-05 | 6,85E-04  | 0,48  | 290    | ANPEP     | alanyl aminopeptidase, membrane                   | NPX_153_AP_N       | AP-N     | no difference |
| P16284  | 0,121  | 4,50    | 3,45  | 5,70E-04 | 3,75E-03  | -1,25 | 5175   | PECAM1    | platelet and endothelial cell adhesion molecule 1 | NPX_194_PECAM_1    | PECAM-1  | no difference |
| P02786  | 0,165  | 5,10    | 3,39  | 7,13E-04 | 4,37E-03  | -1,46 | 7037   | TFRC      | transferrin receptor                              | NPX_133_TR         | TR       | no difference |
| P02452  | 0,119  | 2,07    | 3,32  | 9,31E-04 | 5,35E-03  | -1,71 | 1277   | COL1A1    | collagen type I alpha 1 chain                     | NPX_183_COL1A1     | COL1A1   | no difference |
| P10646  | -0,120 | 8,01    | -3,29 | 1,02E-03 | 5,49E-03  | -1,79 | 7035   | TFPI      | tissue factor pathway inhibitor                   | NPX_130_TFPI       | TFPI     | no difference |
| O00300  | 0,115  | 3,18    | 3,24  | 1,21E-03 | 6,19E-03  | -1,95 | 4982   | TNFRSF11B | TNF receptor superfamily member 11b               | NPX_110_OPG        | OPG      | no difference |
| P33151  | 0,110  | 3,38    | 3,21  | 1,38E-03 | 6,37E-03  | -2,07 | 1003   | CDH5      | cadherin 5                                        | NPX_127_CDH5       | CDH5     | no difference |
| P18065  | 0,168  | 8,07    | 3,21  | 1,38E-03 | 6,37E-03  | -2,07 | 3485   | IGFBP2    | insulin like growth factor binding protein 2      | NPX_192_IGFBP_2    | IGFBP-2  | no difference |
| P14778  | 0,110  | 6,41    | 3,18  | 1,52E-03 | 6,68E-03  | -2,16 | 3554   | IL1R1     | interleukin 1 receptor type 1                     | NPX_155_IL_1RT1    | IL-1RT1  | no difference |
| P04275  | 0,201  | 6,03    | 3,09  | 2,07E-03 | 8,65E-03  | -2,44 | 7450   | VWF       | von Willebrand factor                             | NPX_193_VWF        | vWF      | no difference |
| P10451  | 0,129  | 5,35    | 2,73  | 6,35E-03 | 2,43E-02  | -3,45 | 6696   | SPP1      | secreted phosphoprotein 1                         | NPX_163_OPN        | OPN      | no difference |
| P35247  | 0,138  | 2,63    | 2,73  | 6,35E-03 | 2,43E-02  | -3,46 | 6441   | SFTPD     | surfactant protein D                              | NPX_150_PSP_D      | PSP-D    | no difference |
| P98160  | 0,105  | 6,90    | 2,72  | 6,71E-03 | 2,47E-02  | -3,50 | 3339   | HSPG2     | heparan sulfate proteoglycan 2                    | NPX_122_PLC        | PLC      | no difference |
| P13500  | 0,087  | 2,79    | 2,66  | 7,98E-03 | 2,82E-02  | -3,66 | 6347   | CCL2      | C-C motif chemokine ligand 2                      | NPX_115_MCP_1      | MCP-1    | no difference |
| Q99727  | 0,102  | 4,95    | 2,57  | 1,04E-02 | 3,54E-02  | -3,89 | 7079   | TIMP4     | TIMP metalloproteinase                            | NPX_125_TIMP4      | TIMP4    | no difference |

|        |        |       |       |          |          |       |        |          |                                                       |                       |          |               |
|--------|--------|-------|-------|----------|----------|-------|--------|----------|-------------------------------------------------------|-----------------------|----------|---------------|
| Q96PL1 | 0,176  | 2,98  | 2,52  | 1,19E-02 | 3,91E-02 | -4,01 | 117156 | SCGB3A2  | inhibitor 4<br>secretoglobin family 3A member 2       | NPX_178_SCGB3A2       | SCGB3A2  | no difference |
| Q03405 | 0,096  | 4,62  | 2,47  | 1,38E-02 | 4,37E-02 | -4,14 | 5329   | PLAUR    | plasminogen activator, urokinase receptor             | NPX_162_U_PAR         | U-PAR    | no difference |
| P00749 | 0,089  | 4,40  | 2,45  | 1,46E-02 | 4,46E-02 | -4,19 | 5328   | PLAU     | plasminogen activator, urokinase                      | NPX_173_UPA           | uPA      | no difference |
| P08254 | 0,128  | 7,42  | 2,43  | 1,54E-02 | 4,56E-02 | -4,24 | 4314   | MMP3     | matrix metalloproteinase 3                            | NPX_186_MMP_3         | MMP-3    | no difference |
| Q92876 | -0,080 | 3,22  | -2,38 | 1,74E-02 | 5,01E-02 | -4,35 | 5653   | KLK6     | kallikrein related peptidase 6                        | NPX_189_KLK6          | KLK6     | no difference |
| Q96F46 | 0,081  | 3,71  | 2,34  | 1,94E-02 | 5,34E-02 | -4,44 | 23765  | IL17RA   | interleukin 17 receptor A                             | NPX_105_IL_17RA       | IL-17RA  | no difference |
| Q9Y275 | 0,098  | 5,96  | 2,32  | 2,06E-02 | 5,34E-02 | -4,49 | 10673  | TNFSF13B | TNF superfamily member 13b                            | NPX_159_TNFSF13B      | TNFSF13B | no difference |
| P15086 | 0,128  | 3,86  | 2,31  | 2,08E-02 | 5,34E-02 | -4,50 | 1360   | CPB1     | carboxypeptidase B1                                   | NPX_174_CPB1          | CPB1     | no difference |
| P15090 | 0,159  | 5,93  | 2,31  | 2,11E-02 | 5,34E-02 | -4,52 | 2167   | FABP4    | fatty acid binding protein 4                          | NPX_129_FABP4         | FABP4    | no difference |
| P24158 | 0,092  | 4,42  | 2,29  | 2,21E-02 | 5,34E-02 | -4,55 | 5657   | PRTN3    | proteinase 3                                          | NPX_160_PRTN3         | PRTN3    | no difference |
| P16581 | 0,098  | 2,21  | 2,29  | 2,21E-02 | 5,34E-02 | -4,55 | 6401   | SELE     | selectin E                                            | NPX_136_SELE          | SELE     | no difference |
| Q5T2D2 | -0,087 | 4,09  | -2,28 | 2,28E-02 | 5,39E-02 | -4,58 | 79865  | TREML2   | triggering receptor expressed on myeloid cells like 2 | NPX_128_TLT_2         | TLT-2    | no difference |
| P04080 | 0,104  | 5,14  | 2,12  | 3,44E-02 | 7,90E-02 | -4,93 | 1476   | CSTB     | cystatin B                                            | NPX_114_CSTB          | CSTB     | no difference |
| P00750 | 0,136  | 5,03  | 2,06  | 3,92E-02 | 8,80E-02 | -5,05 | 5327   | PLAT     | plasminogen activator, tissue type                    | NPX_177_T_PA          | t-PA     | no difference |
| Q13867 | 0,062  | 4,76  | 2,02  | 4,41E-02 | 9,50E-02 | -5,15 | 642    | BLMH     | bleomycin hydrolase                                   | NPX_121_BLM_HYDROLASE | BLM HL   | no difference |
| P17931 | -0,064 | 5,04  | -2,01 | 4,44E-02 | 9,50E-02 | -5,15 | 3958   | LGALS3   | galectin 3                                            | NPX_117_GAL_3         | Gal-3    | no difference |
| P28799 | 0,061  | 3,46  | 1,97  | 4,91E-02 | 1,03E-01 | -5,23 | 2896   | GRN      | granulin precursor                                    | NPX_118_GRN           | GRN      | no difference |
| P13598 | 0,070  | 4,93  | 1,95  | 5,16E-02 | 1,06E-01 | -5,28 | 3384   | ICAM2    | intercellular adhesion molecule 2                     | NPX_188_ICAM_2        | ICAM-2   | no difference |
| Q9Y624 | 0,085  | 4,67  | 1,87  | 6,22E-02 | 1,23E-01 | -5,43 | 50848  | F11R     | F11 receptor                                          | NPX_167_JAM_A         | JAM-A    | no difference |
| P36941 | 0,072  | 3,63  | 1,86  | 6,38E-02 | 1,23E-01 | -5,45 | 4055   | LTBR     | lymphotoxin beta receptor                             | NPX_123_LTBR          | LTBR     | no difference |
| Q99969 | -0,068 | 11,33 | -1,85 | 6,42E-02 | 1,23E-01 | -5,46 | 5919   | RARRES2  | retinoic acid receptor responder 2                    | NPX_187_RARRES2       | RARRES2  | no difference |
| O00175 | 0,112  | 5,23  | 1,81  | 7,09E-02 | 1,33E-01 | -5,54 | 6369   | CCL24    | C-C motif chemokine ligand 24                         | NPX_132_CCL24         | CCL24    | no difference |
| P15085 | 0,104  | 4,32  | 1,77  | 7,65E-02 | 1,41E-01 | -5,60 | 1357   | CPA1     | carboxypeptidase A1                                   | NPX_166_CPA1          | CPA1     | no difference |
| Q13740 | 0,052  | 4,67  | 1,72  | 8,51E-02 | 1,51E-01 | -5,69 | 214    | ALCAM    | activated leukocyte cell adhesion molecule            | NPX_111_ALCAM         | ALCAM    | no difference |

|        |        |       |       |          |          |       |        |           |                                          |                        |           |               |
|--------|--------|-------|-------|----------|----------|-------|--------|-----------|------------------------------------------|------------------------|-----------|---------------|
| P30530 | 0,064  | 7,59  | 1,72  | 8,56E-02 | 1,51E-01 | -5,69 | 558    | AXL       | AXL receptor tyrosine kinase             | NPX_154_AXL            | AXL       | no difference |
| P36222 | 0,110  | 6,30  | 1,71  | 8,68E-02 | 1,51E-01 | -5,70 | 1116   | CHI3L1    | chitinase 3 like 1                       | NPX_175_CHI3L1         | CHI3L1    | no difference |
| Q86VB7 | 0,071  | 7,36  | 1,71  | 8,84E-02 | 1,51E-01 | -5,72 | 9332   | CD163     | CD163 molecule                           | NPX_116_CD163          | CD163     | no difference |
| Q9NPY3 | 0,063  | 9,34  | 1,67  | 9,44E-02 | 1,58E-01 | -5,77 | 22918  | CD93      | CD93 molecule                            | NPX_181_CD93           | CD93      | no difference |
| P08887 | -0,057 | 10,54 | -1,51 | 1,31E-01 | 2,15E-01 | -6,03 | 3570   | IL6R      | interleukin 6 receptor                   | NPX_142_IL_6RA         | IL6-RA    | no difference |
| Q9UBR2 | -0,055 | 4,77  | -1,50 | 1,35E-01 | 2,17E-01 | -6,05 | 1522   | CTSZ      | cathepsin Z                              | NPX_185_CTSZ           | CTSZ      | no difference |
| O00626 | -0,088 | 2,15  | -1,46 | 1,44E-01 | 2,28E-01 | -6,10 | 6367   | CCL22     | C-C motif chemokine ligand 22            | NPX_149_CCL22          | CCL22     | no difference |
| P56470 | -0,064 | 3,54  | -1,44 | 1,50E-01 | 2,34E-01 | -6,13 | 3960   | LGALS4    | galectin 4                               | NPX_168_GAL_4          | Gal-4     | no difference |
| Q12860 | 0,047  | 2,44  | 1,38  | 1,68E-01 | 2,57E-01 | -6,22 | 1272   | CNTN1     | contactin 1                              | NPX_126_CNTN1          | CNTN1     | no difference |
| P27930 | 0,046  | 4,52  | 1,36  | 1,73E-01 | 2,61E-01 | -6,24 | 7850   | IL1R2     | interleukin 1 receptor type 2            | NPX_169_IL_1RT2        | IL-1RT2   | no difference |
| Q07654 | 0,066  | 5,82  | 1,32  | 1,87E-01 | 2,76E-01 | -6,30 | 7033   | TFF3      | trefoil factor 3                         | NPX_112_TFF3           | TFF3      | no difference |
| P19438 | 0,057  | 5,49  | 1,31  | 1,89E-01 | 2,76E-01 | -6,30 | 7132   | TNFRSF1A  | TNF receptor superfamily member 1A       | NPX_191_TNF_R1         | TNF-R1    | no difference |
| P20160 | 0,048  | 2,12  | 1,27  | 2,03E-01 | 2,91E-01 | -6,35 | 566    | AZU1      | azurocidin 1                             | NPX_137_AZU1           | AZU1      | no difference |
| P80370 | -0,065 | 5,01  | -1,26 | 2,09E-01 | 2,96E-01 | -6,38 | 8788   | DLK1      | delta like non-canonical Notch ligand 1  | NPX_138_DLK_1          | DLK-1     | no difference |
| Q9HD89 | 0,052  | 6,40  | 1,20  | 2,32E-01 | 3,19E-01 | -6,45 | 56729  | RETN      | resistin                                 | NPX_143_RETN           | RETN      | no difference |
| Q16663 | 0,052  | 7,03  | 1,19  | 2,32E-01 | 3,19E-01 | -6,45 | 6359   | CCL15     | C-C motif chemokine ligand 15            | NPX_171_CCL15          | CCL15     | no difference |
| Q9NQ76 | -0,044 | 2,86  | -1,14 | 2,54E-01 | 3,44E-01 | -6,51 | 56955  | MEPE      | matrix extracellular phosphoglycoprotein | NPX_120_MEPE           | MEPE      | no difference |
| P01589 | -0,049 | 4,25  | -1,13 | 2,58E-01 | 3,44E-01 | -6,53 | 3559   | IL2RA     | interleukin 2 receptor subunit alpha     | NPX_109_IL2_RA         | IL2-RA    | no difference |
| O14798 | -0,043 | 5,86  | -1,10 | 2,72E-01 | 3,57E-01 | -6,56 | 8794   | TNFRSF10C | TNF receptor superfamily member 10c      | NPX_134_TNFRSF10C      | TNFRSF10C | no difference |
| P04085 | 0,058  | 1,36  | 1,07  | 2,85E-01 | 3,70E-01 | -6,59 | 5154   | PDGFA     | platelet derived growth factor subunit A | NPX_190_PDGF_SUBUNIT_A | PDGFsA    | no difference |
| O75594 | 0,041  | 7,07  | 0,94  | 3,45E-01 | 4,41E-01 | -6,72 | 8993   | PGLYRP1   | peptidoglycan recognition protein 1      | NPX_165_PGLYRP1        | PGLYRP1   | no difference |
| P07339 | 0,032  | 3,58  | 0,93  | 3,53E-01 | 4,45E-01 | -6,73 | 1509   | CTSD      | cathepsin D                              | NPX_164_CTSD           | CTSD      | no difference |
| P19957 | 0,046  | 3,71  | 0,88  | 3,80E-01 | 4,72E-01 | -6,78 | 5266   | PI3       | peptidase inhibitor 3                    | NPX_151_PI3            | PI3       | no difference |
| O15467 | 0,039  | 5,92  | 0,85  | 3,96E-01 | 4,86E-01 | -6,80 | 6360   | CCL16     | C-C motif chemokine ligand 16            | NPX_196_CCL16          | CCL16     | no difference |
| P02144 | 0,047  | 6,92  | 0,81  | 4,17E-01 | 5,05E-01 | -6,83 | 4151   | MB        | myoglobin                                | NPX_158_MB             | MB        | no difference |
| P78324 | 0,030  | 3,51  | 0,79  | 4,32E-01 | 5,16E-01 | -6,85 | 140885 | SIRPA     | signal regulatory protein alpha          | NPX_170_SHPS_1         | SHPS-1    | no difference |
| P20333 | 0,035  | 5,01  | 0,77  | 4,40E-01 | 5,19E-01 | -6,87 | 7133   | TNFRSF1B  | TNF receptor                             | NPX_106_TNF_R2         | TNF-R2    | no difference |

|        |        |      |       |          |          |       |        |          |                                               |                      |          |               |
|--------|--------|------|-------|----------|----------|-------|--------|----------|-----------------------------------------------|----------------------|----------|---------------|
|        |        |      |       |          |          |       |        |          | superfamily member 1B                         |                      |          |               |
| Q8NBP7 | -0,021 | 2,22 | -0,72 | 4,69E-01 | 5,47E-01 | -6,90 | 255738 | PCSK9    | proprotein convertase subtilisin/kexin type 9 | NPX_161_PCSK9        | PCSK9    | no difference |
| O95998 | 0,027  | 6,35 | 0,65  | 5,16E-01 | 5,93E-01 | -6,95 | 10068  | IL18BP   | interleukin 18 binding protein                | NPX_182_IL_18BP      | IL-18BP  | no difference |
| P00533 | -0,016 | 1,01 | -0,63 | 5,29E-01 | 6,01E-01 | -6,96 | 1956   | EGFR     | epidermal growth factor receptor              | NPX_179_EGFR         | EGFR     | no difference |
| Q13231 | -0,047 | 2,77 | -0,55 | 5,81E-01 | 6,52E-01 | -7,01 | 1118   | CHIT1    | chitinase 1                                   | NPX_145_CHIT1        | CHIT1    | no difference |
| Q9H2A7 | -0,015 | 6,09 | -0,45 | 6,52E-01 | 7,12E-01 | -7,06 | 58191  | CXCL16   | C-X-C motif chemokine ligand 16               | NPX_141_CXCL16       | CXCL16   | no difference |
| P05121 | 0,031  | 4,66 | 0,45  | 6,53E-01 | 7,12E-01 | -7,06 | 5054   | SERPINE1 | serpin family E member 1                      | NPX_131_PA1          | PA1      | no difference |
| P25445 | 0,015  | 4,71 | 0,44  | 6,58E-01 | 7,12E-01 | -7,06 | 355    | FAS      | Fas cell surface death receptor               | NPX_157_FAS          | FAS      | no difference |
| P05164 | 0,013  | 3,92 | 0,40  | 6,93E-01 | 7,41E-01 | -7,08 | 4353   | MPO      | myeloperoxidase                               | NPX_140_MPO          | MPO      | no difference |
| Q92956 | 0,014  | 4,71 | 0,31  | 7,56E-01 | 7,99E-01 | -7,11 | 8764   | TNFRSF14 | TNF receptor superfamily member 14            | NPX_101_TNFRSF14     | TNFRSF14 | no difference |
| P14780 | -0,015 | 3,49 | -0,27 | 7,90E-01 | 8,26E-01 | -7,13 | 4318   | MMP9     | matrix metalloproteinase 9                    | NPX_107_MMP_9        | MMP-9    | no difference |
| P16109 | -0,008 | 8,37 | -0,18 | 8,60E-01 | 8,89E-01 | -7,15 | 6403   | SELP     | selectin P                                    | NPX_113_SELP         | SELP     | no difference |
| P42574 | 0,009  | 6,42 | 0,14  | 8,87E-01 | 9,07E-01 | -7,15 | 836    | CASP3    | caspase 3                                     | NPX_172_CASP_3       | CASP-3   | no difference |
| P54760 | -0,002 | 2,04 | -0,08 | 9,39E-01 | 9,49E-01 | -7,16 | 2050   | EPHB4    | EPH receptor B4                               | NPX_108_EPHB4        | EPHB4    | no difference |
| P05107 | -0,002 | 4,55 | -0,04 | 9,65E-01 | 9,65E-01 | -7,16 | 3689   | ITGB2    | integrin subunit beta 2                       | NPX_103_ITGB2        | ITGB2    | no difference |
| P13686 | -0,302 | 5,02 | -8,71 | 9,91E-18 | 4,43E-16 | 29,42 | 54     | ACP5     | acid phosphatase 5, tartrate resistant        | NPX_148_TR_AP        | TR-AP    | downregulated |
| P01130 | -0,282 | 3,63 | -6,21 | 7,46E-10 | 9,80E-09 | 11,70 | 3949   | LDLR     | low density lipoprotein receptor              | NPX_102_LDL_RECEPTOR | LDL      | downregulated |
| Q15166 | -0,257 | 5,04 | -4,86 | 1,31E-06 | 1,34E-05 | 4,49  | 5446   | PON3     | paraoxonase 3                                 | NPX_184_PON3         | PON3     | downregulated |
| P16422 | -0,225 | 3,55 | -3,97 | 7,58E-05 | 6,34E-04 | 0,63  | 4072   | EPCAM    | epithelial cell adhesion molecule             | NPX_152_EP_CAM       | Ep-Cam   | downregulated |
